# Supplementary material
Source: publisher figshare collection journal article supplement (https://tandf.figshare.com/articles/dataset/_/9915911)
Supplement: Supplementary file 1 [file 1]

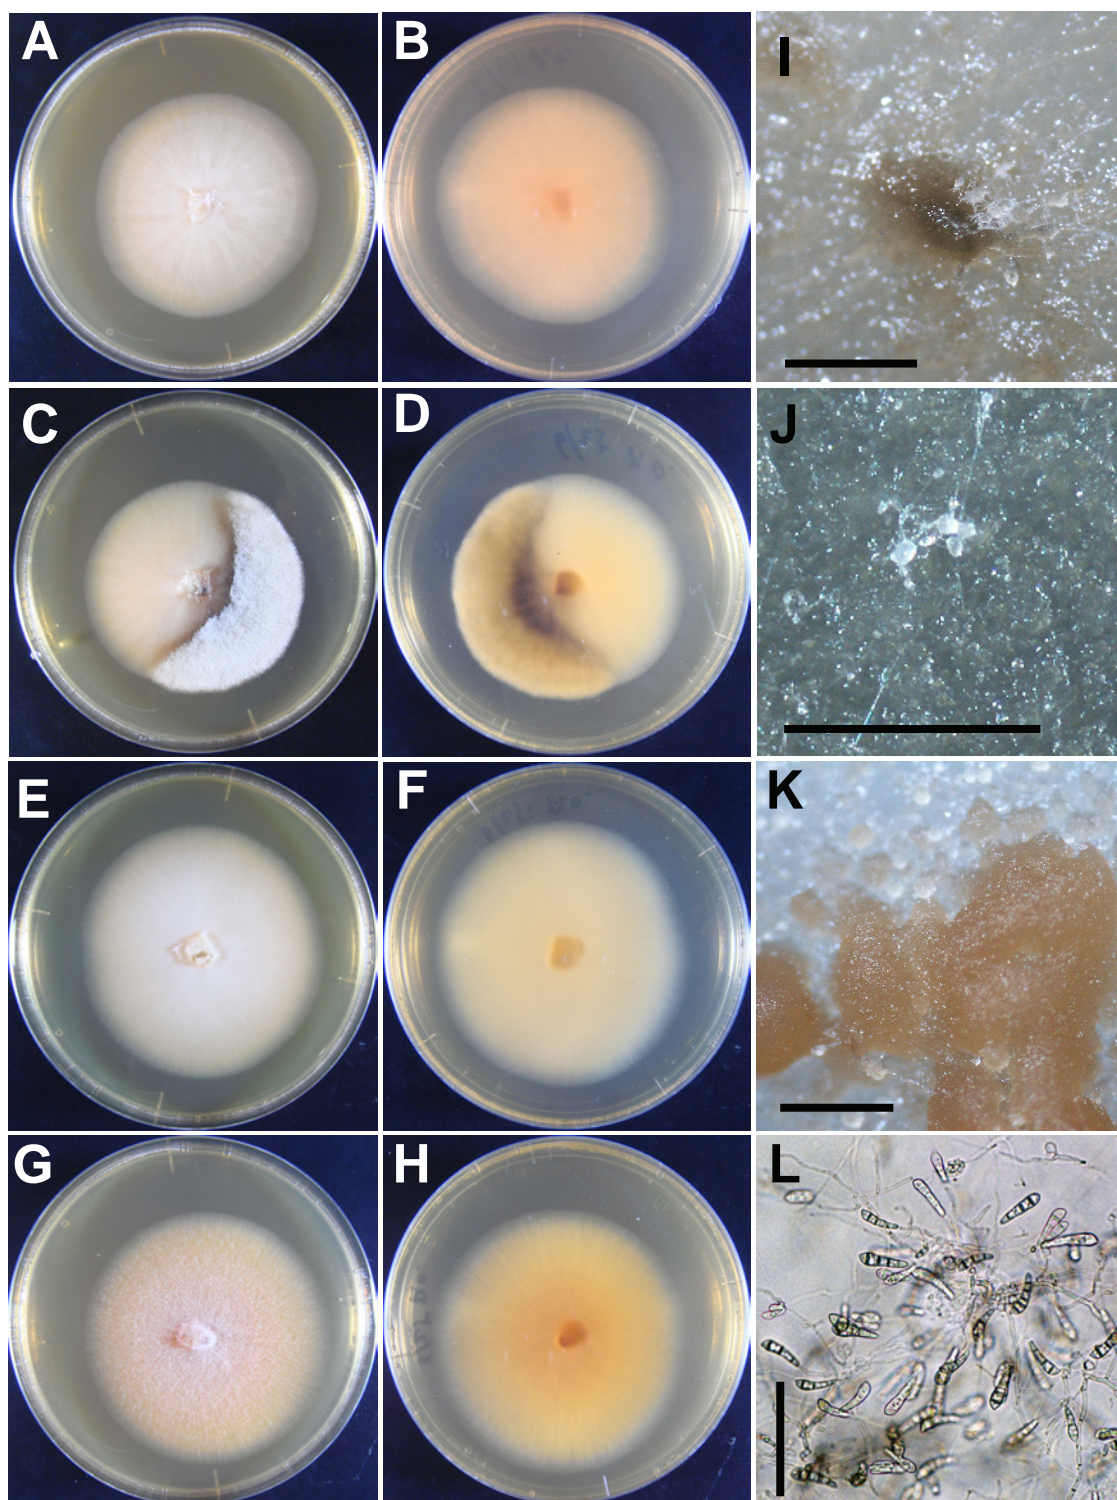

**Supplementary Fig. 2A–L.** Colony morphology (top and reverse views) and sporodochia of the three new Ambrosia Fusarium Clade species formed in culture. **A–H:** Colonies formed in cultures on PDA for 6 d in the dark at 25 C in 9 cm Petri-dishes; **A** (top) & **B** (reverse): *Fusarium floridanum* NRRL 62628 (ex-holotype); **C** (top) & **D** (reverse): *F. floridanum* NRRL 62629 representing formation of a sectored colony; **E** (top) & **F** (reverse): *F. tuaranense* NRRL 22231 (ex-holotype); **G** (top) & **H** (reverse): *F. obliquiseptatum* NRRL 62611 (ex-holotype). **I–K:** Sporodochia formed in cultures on PDA in the dark at 20 C after 1 mo; **I:** *F. floridanum* NRRL 62628 (ex-holotype); **J:** *F. tuaranense* NRRL 22231 (ex-holotype); **K:** *F. obliquiseptatum* NRRL 62611 (ex-holotype). **L:** A magnified portion of a sporodochium formed by *F. obliquiseptatum* NRRL 62611 (ex-holotype) on SNA under black light at 20 C after 2 wk. **Bars:** **I–K** 0.5 mm; **L** 100  $\mu$ m.
